# Supplementary material
Source: PubMed Central journal article supplement (PMC5628725)
Supplement: CJN.09590916SupplementaryData.pdf [file CJN.09590916SupplementaryData.pdf]

Supplemental material is neither peer-reviewed nor thoroughly edited by CJASN. The authors alone are responsible for the accuracy and presentation of the material.

**Table S1:** Demographic and baseline clinical characteristics

| Parameters                        | Total<br>N=3055     | Placebo<br>N=711    | Losartan<br>N=721   | Placebo<br>N=541    | Amlodipine<br>N=534 | Irbesartan<br>N=548 |
|-----------------------------------|---------------------|---------------------|---------------------|---------------------|---------------------|---------------------|
| Age (yrs.)                        | 59.4 (7.6)          | 60.2 (7.5)          | 60.0 (7.4)          | 58.3 (8.1)          | 59.1 (7.9)          | 59.2 (7.1)          |
| Female Gender n, (%)              | 1067 (34.9)         | 253 (35.6)          | 277 (38.4)          | 156 (28.8)          | 194 (36.3)          | 187 (34.1)          |
| Race, n, (%)                      |                     |                     |                     |                     |                     |                     |
| Caucasian                         | 1876 (61.4)         | 350 (49.2)          | 345 (47.9)          | 395 (73.0)          | 371 (69.5)          | 415 (75.7)          |
| Black                             | 430 (14.1)          | 97 (13.6)           | 118 (16.4)          | 75 (13.9)           | 81 (15.2)           | 59 (10.8)           |
| Hispanic                          | 336 (11.0)          | 131 (18.4)          | 132 (18.3)          | 22 (4.1)            | 26 (4.9)            | 25 (4.6)            |
| Asian                             | 319 (10.4)          | 125 (17.6)          | 115 (16.0)          | 26 (4.8)            | 30 (5.6)            | 23 (4.2)            |
| Other                             | 94 (3.1)            | 8 (1.1)             | 11 (1.5)            | 23 (4.3)            | 26 (4.9)            | 26 (4.7)            |
| Serum creatinine (mg/dL)          | 1.8 (0.5)           | 1.9 (0.5)           | 1.9 (0.5)           | 1.7 (0.6)           | 1.7 (0.6)           | 1.7 (0.5)           |
| eGFR (ml/min/1.73m <sup>2</sup> ) | 43.8 (15.9)         | 39.9 (12.7)         | 39.5 (11.9)         | 48.0 (18.4)         | 47.7 (17.7)         | 46.6 (17.0)         |
| CER (mg/24hr)                     | 1415 (661)          | 1374 (1041)         | 1308 (599)          | 1459 (585)          | 1446 (558)          | 1436 (531)          |
| Systolic BP (mmHg)                | 156 (19.8)          | 153 (19.9)          | 152 (18.8)          | 158 (20.4)          | 159 (19.3)          | 160 (19.5)          |
| Diastolic BP (mmHg)               | 84.8 (11.0)         | 82.4 (10.7)         | 82.3 (10.3)         | 86.8 (11.0)         | 87.1 (10.8)         | 86.9 (11.4)         |
| Weight (kg)                       | 84.8 (20.1)         | 82.1 (21.2)         | 82.4 (20.6)         | 87.2 (19.5)         | 86.3 (19.5)         | 87.8 (18.1)         |
| UACR (mg/g)                       | 1348<br>[678, 2615] | 1265<br>[585, 2472] | 1182<br>[545, 2620] | 1526<br>[750, 2670] | 1403<br>[691, 2470] | 1478<br>[803, 2803] |
| Hemoglobin (mg/dL)                | 12.8 (1.9)          | 12.5 (1.8)          | 12.5 (1.8)          | 13.0 (1.9)          | 12.9 (1.9)          | 13.0 (1.9)          |
| Urea Nitrogen (mg/dL)             | 31.2 (12.3)         | 32.3 (12.3)         | 32.5 (12.2)         | 29.7 (12.3)         | 29.8 (11.8)         | 30.8 (12.7)         |
| Potassium (mmol/L)                | 4.6 (0.5)           | 4.6 (0.5)           | 4.6 (0.5)           | 4.6 (0.5)           | 4.6 (0.5)           | 4.6 (0.5)           |
| Uric acid (mg/dL)                 | 6.8 (1.8)           | 6.7 (1.7)           | 6.7 (1.7)           | 6.8 (1.9)           | 6.8 (1.8)           | 6.8 (1.9)           |
| Calcium (mg/dL)                   | 9.3 (0.5)           | 9.4 (0.5)           | 9.4 (0.5)           | 9.2 (0.6)           | 9.2 (0.5)           | 9.2 (0.5)           |
| Phosphate (mg/dL)                 | 3.8 (0.6)           | 3.9 (0.6)           | 3.9 (0.6)           | 3.8 (0.6)           | 3.8 (0.7)           | 3.8 (0.6)           |
| CVD history (yes), n, (%)         | 1376 (45.0)         | 311 (43.7)          | 330 (45.8)          | 238 (44.0)          | 238 (44.6)          | 259 (47.3)          |

Abbreviations: BP, blood pressure; eGFR, estimated glomerular filtration rate; CER: creatinine excretion rate; UACR, urinary albumin to creatinine ratio; CVD, cardiovascular disease; Note: Values for categorical variables are reported as percentages; values for continuous variables are reported as mean ± standard deviation or median [interquartile range]

**Table S2:** Difference in the time to RRT and eGFR11 in the population with the sum of square of the residuals below the individual based eGFR regression below the median.

|                                                 | eGFR <sub>11</sub> before RRT |                                                                          | eGFR <sub>11</sub> after RRT |                                                                          | Accuracy<br>P <sub>90</sub> (%) |
|-------------------------------------------------|-------------------------------|--------------------------------------------------------------------------|------------------------------|--------------------------------------------------------------------------|---------------------------------|
|                                                 | Patients with<br>RRT (N)      | Median (25 <sup>th</sup> – 75 <sup>th</sup> P) time<br>difference (days) | Patients with<br>RRT (N)     | Median (25 <sup>th</sup> – 75 <sup>th</sup> P) time<br>difference (days) |                                 |
| eGFR <sub>11</sub> vs. RRT                      | 259                           | 152 [82 – 261]                                                           | 124                          | 152 [51 – 414]                                                           | 30.5                            |
| eGFR <sub>11-first</sub> vs. RRT                | 79                            | 161 [115 – 276]                                                          | n/a                          | n/a                                                                      | 12.7                            |
| eGFR <sub>11</sub> vs. eGFR <sub>11-first</sub> | 50                            | 47 [27 – 64]                                                             | 30                           | 50 [21 – 82]                                                             | 81.3                            |

Abbreviations: eGFR<sub>11</sub>, time to eGFR 11 mL/min/1.73m<sup>2</sup> based on individual's eGFR slope; eGFR<sub>11-first</sub>, time to first eGFR 11 measurement confirmed by the second measurement of reaching eGFR<sub>11</sub>; P, Percentile

**Table S3:** Difference in the time to RRT and eGFR15 in patients who either reached eGFR<sub>15</sub> before or after RRT

|                                                 | eGFR <sub>15</sub> before RRT |                                                                          | eGFR <sub>15</sub> after RRT |                                                                          | Accuracy<br>P <sub>90</sub> (%) |
|-------------------------------------------------|-------------------------------|--------------------------------------------------------------------------|------------------------------|--------------------------------------------------------------------------|---------------------------------|
|                                                 | Patients with<br>RRT (N)      | Median (25 <sup>th</sup> – 75 <sup>th</sup> P) time<br>difference (days) | Patients with<br>RRT (N)     | Median (25 <sup>th</sup> – 75 <sup>th</sup> P) time<br>difference (days) |                                 |
| eGFR <sub>15</sub> vs. RRT                      | 370                           | 241 [140 – 364]                                                          | 78                           | 228 [100 – 436]                                                          | 14.8                            |
| eGFR <sub>15-first</sub> vs. RRT                | 220                           | 240 [161 – 385]                                                          | n/a                          | n/a                                                                      | 6.4                             |
| eGFR <sub>15</sub> vs. eGFR <sub>15-first</sub> | 152                           | 44 [19 – 85]                                                             | 68                           | 42 [23 – 80]                                                             | 78.2                            |

Abbreviations: eGFR<sub>15</sub>, time to eGFR 15 mL/min/1.73m<sup>2</sup> based on individual's eGFR slope; eGFR<sub>15-first</sub>, time to first eGFR 15 measurement confirmed by the second measurement of reaching eGFR<sub>15</sub>; P, Percentile
